# Supplementary material for: Genome-Wide Detection of Gene Coexpression Domains Showing Linkage to Regions Enriched with Polymorphic Retrotransposons in Recombinant Inbred Mouse Strains
Source: PubMed Central journal article supplement (PMC3618347; doi:10.1534/g3.113.005546), 2013-04-01
Supplement: supp_g3.113.005546_FigureS1.pdf [file supp_g3.113.005546_FigureS1.pdf]

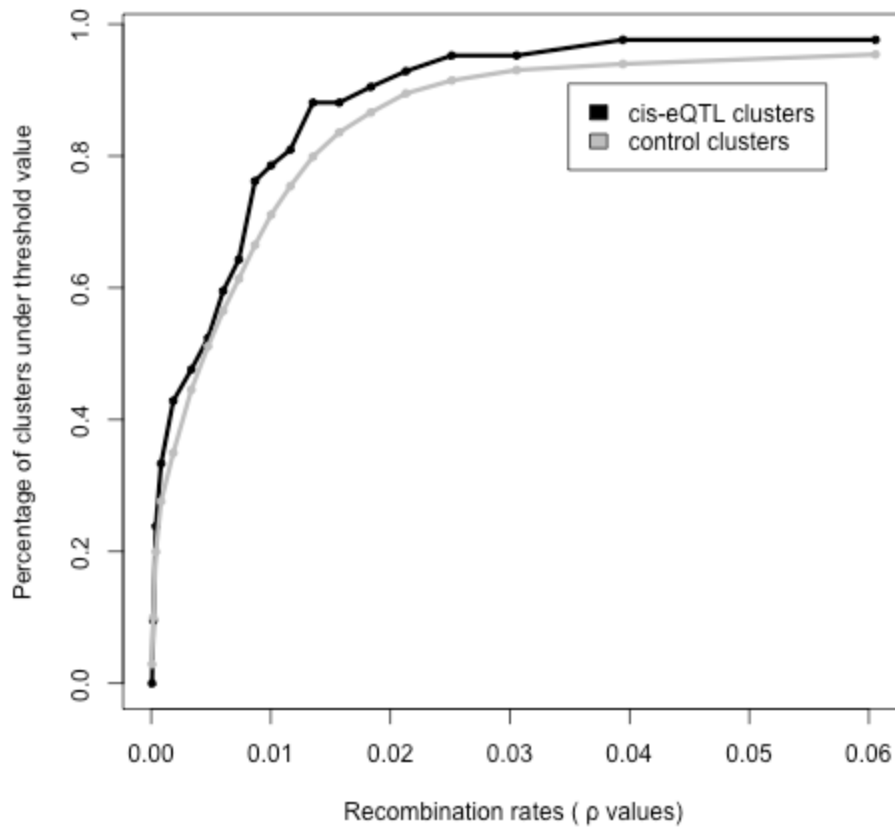

**Figure S1** Distribution of recombination rates in regions corresponding to either cis-eQTL or control clusters. The recombination rate values corresponded to the  $\rho$  values, as calculated and reported by Brunshwig H et al. (Genetics 191: 757–764, 2012). According to the Chi-square test, there was no significant difference in the distributions of recombination rates in the 2 types of regions ( $P > 0.3$ ).
