# Supplementary material for: Genome-Wide Detection of Gene Coexpression Domains Showing Linkage to Regions Enriched with Polymorphic Retrotransposons in Recombinant Inbred Mouse Strains
Source: PubMed Central journal article supplement (PMC3618347; doi:10.1534/g3.113.005546), 2013-04-01
Supplement: supp_g3.113.005546_TableS1.pdf [file supp_g3.113.005546_TableS1.pdf]

**Table S1 Abundance of polymorphic and total TEs in mouse genomes.** Lists of polymorphic TEs were obtained from either the publication of Nellåker et al (2012) or from the MouseIndelDB database. Lists of fixed TEs were obtained from the Transposome database. n/a: non available.

| Database                                     | Genetic origin  | full LINES | LINE frag. | LTR-TEs | SINEs   |
|----------------------------------------------|-----------------|------------|------------|---------|---------|
|                                              |                 |            |            |         |         |
| <b>Nellåker et al.<br/>(polymorphic TEs)</b> | Both strains    | 1808       | 2969       | 4734    | 4303    |
|                                              | C57(+) / A/J(-) | 606        | 1015       | 1901    | 2378    |
|                                              | C57(-) / A/J(+) | 1202       | 1954       | 2833    | 1925    |
|                                              |                 |            |            |         |         |
| <b>MouseIndelDB<br/>(polymorphic TEs)</b>    | Both strains    |            |            | 2413    | 1512    |
|                                              | C57(+) / A/J(-) |            |            | 1436    | 1512    |
|                                              | C57(-) / A/J(+) |            |            | 977     | 0       |
|                                              |                 |            |            |         |         |
| <b>Transposome<br/>(fixed TEs)</b>           |                 | 78,002     | n/a        | 84,724  | 190,057 |
|                                              |                 |            |            |         |         |
