# Supplementary material for: Genome-Wide Detection of Gene Coexpression Domains Showing Linkage to Regions Enriched with Polymorphic Retrotransposons in Recombinant Inbred Mouse Strains
Source: PubMed Central journal article supplement (PMC3618347; doi:10.1534/g3.113.005546), 2013-04-01
Supplement: supp_g3.113.005546_TableS2.pdf [file supp_g3.113.005546_TableS2.pdf]

**Table S2 Summary of gene expression datasets from mouse RIS.** Each line provides information about which tissue and which RIS panel was used for each gene expression dataset, as well as about the number of strains that were profiled and the nature of the microarray platform. The GN access numbers corresponds to the identification number of corresponding datasets in GeneNetwork.

| <b>Tissue</b> | <b>RIS panel</b> | <b># of strains used</b> | <b>Microarray platform</b>     | <b>GN access #</b> |
|---------------|------------------|--------------------------|--------------------------------|--------------------|
| Eye           | AxB/BxA          | 26                       | Illumina<br>MouseRef-6         | GN210              |
| Eye           | BxD              | 68                       | Affymetrix Mouse<br>Genome 430 | GN207              |
| Kidney        | BxD              | 54                       | Affymetrix Mouse<br>Genome 430 | GN240              |
| Hippocampus   | BxD              | 67                       | Affymetrix Mouse<br>Genome 430 | GN112              |
| Hypothalamus  | BxD              | 33                       | Affymetrix MoGene 1.0 ST       | GN281              |
| Cerebellum    | BxD              | 28                       | Affymetrix Mouse<br>Genome 430 | GN72               |
