# Supplementary material for: Genome-Wide Detection of Gene Coexpression Domains Showing Linkage to Regions Enriched with Polymorphic Retrotransposons in Recombinant Inbred Mouse Strains
Source: PubMed Central journal article supplement (PMC3618347; doi:10.1534/g3.113.005546), 2013-04-01
Supplement: supp_g3.113.005546_TableS3.pdf [file supp_g3.113.005546_TableS3.pdf]

**Table S3 Properties of cis-eQTL and control clusters (defined using three different window sizes).** In addition to the sizes of the intervals between detected genes, some additional criteria were used in the selection of control clusters in order to have them match cis-eQTL clusters for size and density of total genes. For the 250 kB intervals, only clusters <400 kB and containing more than 3 genes were kept; for the 500 kB, only clusters <650 kB and containing at least 6 genes were kept; for the 750 kB intervals, only clusters of <800 kb and containing at least 8 genes were kept.

| Maximum interval between cis-eQTLs or detected genes | 250kB             |                 |       | 500kB             |                 |       | 750kB             |                 |       |
|------------------------------------------------------|-------------------|-----------------|-------|-------------------|-----------------|-------|-------------------|-----------------|-------|
|                                                      | Cis-eQTL clusters | Control cluters | p-val | Cis-eQTL clusters | Control cluters | p-val | Cis-eQTL clusters | Control cluters | p-val |
| Size of boxes (in kb)                                | 221.9 ±130        | 248±            | 0.2   | 467.1 ±486        | 456±119         | 0.87  | 658.8 ±553        | 561±123         | 0.2   |
| Number of detected genes                             | 4.2 ±1.9          | 4.75±           | 0.1   | 4.9 ±3.5          | 5.23±2.46       | 0.63  | 5.1 ±3.6          | 6.6±3.89        | 0.11  |
| Total number of genes                                | 7.2 ±6.6          | 6.30 ±2.9       | 0.38  | 12.3 ±16          | 10.1±3.45       | 0.35  | 15.70±17.6        | 14.9±11.1       | 0.81  |
| Number of clusters                                   | 42                | 188             |       | 53                | 59              |       | 61                | 21              |       |
