# Supplementary material for: Genome-Wide Detection of Gene Coexpression Domains Showing Linkage to Regions Enriched with Polymorphic Retrotransposons in Recombinant Inbred Mouse Strains
Source: PubMed Central journal article supplement (PMC3618347; doi:10.1534/g3.113.005546), 2013-04-01
Supplement: supp_g3.113.005546_TableS4.pdf [file supp_g3.113.005546_TableS4.pdf]

**Table S4 Normalized abundance of polymorphic and fixed TEs in several sizes of genomic regions around “250 kb” clusters.** Normalized abundance of TEs was calculated by dividing the abundance of each element with that found in random regions. Test regions corresponded to those containing cis-eQTLs (either clustered or single) or control clusters, each region being augmented by flanking regions of either 250, 500, 1000 kb.

|                                                     |                                              | Polymorphic |             |             |             | Fixed       |             |
|-----------------------------------------------------|----------------------------------------------|-------------|-------------|-------------|-------------|-------------|-------------|
|                                                     |                                              | full LINES  | LINE frag.  | LTR-TEs     | SINEs       | LTR-TEs     | SINEs       |
| <b>Size of flanking regions</b>                     | 250 kb                                       |             |             |             |             |             |             |
| <b>Normalized abundance of TEs / MB (mean ± SD)</b> | Cis-eqtl clusters (n=42)                     | 0.51 ± 1.39 | 0.77 ± 1.42 | 2.27 ± 1.75 | 4.78 ± 3.51 | 1.55 ± 2.17 | 2.85 ± 3.01 |
|                                                     | CTL clusters (n=188)                         | 0.46 ± 1.16 | 0.55 ± 1.01 | 1.28 ± 1.58 | 1.45 ± 2.07 | 1.53 ± 1.3  | 2.05 ± 1.62 |
|                                                     | Single cis-eQTL regions (n=232)              | 0.59 ± 1.32 | 0.94 ± 1.33 | 1.8 ± 1.53  | 1.97 ± 1.84 | 1.53 ± 1.26 | 1.71 ± 1.78 |
|                                                     | Random regions (n=500)                       | 1 ± 2.04    | 1 ± 1.72    | 1 ± 1.39    | 1 ± 1.72    | 1 ± 1.27    | 1 ± 1.42    |
| <b>Anova P values</b>                               |                                              | 0.00039     | 0.0059      | 1.22E-13    | 1.11E-33    | 3.15E-08    | 4.40E-20    |
| <b>Post-hoc Tukey P values</b>                      | Cis-eqtl clusters vs CTL                     | 0.99        | 0.83        | 0.00053     | <e-5        | 0.99        | 0.02306     |
|                                                     | Cis-eqtl clusters vs single cis-eQTL regions | 0.99        | 0.90        | 0.22        | <e-5        | 0.99        | 0.00023     |
|                                                     | Cis-eqtl clusters vs random                  | 0.28        | 0.77        | <e-5        | <e-5        | 0.048       | <e-5        |
|                                                     | Control and single cis-eQTL regions          | 0.8         | 0.042       | 0.0019      | 0.029       | 0.99        | 0.15        |
|                                                     | CTL vs random                                | 0.001       | 0.003       | 0.12        | 0.03        | 2.00E-05    | <e-5        |
|                                                     | Random vs single cis-eQTL regions            | 0.015       | 0.96        | <e-5        | <e-5        | <e-5        | <e-5        |

|                                                     |                                              | Polymorphic |             |             |             | Fixed       |             |
|-----------------------------------------------------|----------------------------------------------|-------------|-------------|-------------|-------------|-------------|-------------|
|                                                     |                                              | full LINES  | LINE frag.  | LTR-TEs     | SINEs       | LTR-TEs     | SINEs       |
| <b>Size of flanking regions</b>                     | 500 kb                                       |             |             |             |             |             |             |
| <b>Normalized abundance of TEs / MB (mean ± SD)</b> | Cis-eqtl clusters (n=42)                     | 0.54 ± 1.42 | 0.98 ± 1.69 | 1.88 ± 1.43 | 4.14 ± 2.84 | 1.39 ± 1.22 | 2.46 ± 1.86 |
|                                                     | CTL clusters (n=188)                         | 0.61 ± 1.16 | 0.65 ± 1.05 | 1.10 ± 1.25 | 1.27 ± 1.59 | 1.41 ± 1.10 | 1.79 ± 1.39 |
|                                                     | Single cis-eQTL regions (n=232)              | 0.75 ± 1.24 | 0.93 ± 1.07 | 1.62 ± 1.21 | 1.7 ± 1.45  | 1.39 ± 1.1  | 1.53 ± 1.48 |
|                                                     | Random regions (n=500)                       | 1 ± 1.77    | 1 ± 1.51    | 1 ± 1.20    | 1 ± 1.6     | 1 ± 1.10    | 1 ± 1.29    |
| <b>Anova P values</b>                               |                                              | 0.0068      | 0.024       | 1.12E-11    | 2.22E-31    | 1.01E-06    | 6.32E-17    |
| <b>Post-hoc Tukey P values</b>                      | Cis-eqtl clusters vs CTL                     | 0.99        | 0.47        | 0.001       | <e-5        | 0.99        | 0.024       |
|                                                     | Cis-eqtl clusters vs single cis-eQTL regions | 0.83        | 0.99        | 0.58        | <e-5        | 1           | 0.00041     |
|                                                     | Cis-eqtl clusters vs random                  | 0.23        | 0.99        | 5.00E-05    | <e-5        | 0.12352     | <e-5        |
|                                                     | Control and single cis-eQTL regions          | 0.75        | 0.13        | 8.00E-05    | 0.03        | 0.99        | 0.22        |
|                                                     | CTL vs random                                | 0.014       | 0.013       | 0.79        | 0.21        | 1.00E-04    | <e-5        |
|                                                     | Random vs single cis-eQTL regions            | 0.18        | 0.92        | <e-5        | <e-5        | 6.00E-05    | 1.00E-05    |

|                                                     |                                              | Polymorphic |             |             |             | Fixed       |             |
|-----------------------------------------------------|----------------------------------------------|-------------|-------------|-------------|-------------|-------------|-------------|
|                                                     |                                              | full LINES  | LINE frag.  | LTR-TEs     | SINEs       | LTR-TEs     | SINEs       |
| <b>Size of flanking regions</b>                     | 1 MB                                         |             |             |             |             |             |             |
| <b>Normalized abundance of TEs / MB (mean ± SD)</b> | Cis-eqtl clusters (n=42)                     | 0.59 ± 1.25 | 0.93 ± 1.27 | 1.71 ± 1.17 | 3.47 ± 2.36 | 1.26 ± 0.93 | 2.12 ± 1.54 |
|                                                     | CTL clusters (n=188)                         | 0.76 ± 1.26 | 0.72 ± 1.02 | 1.06 ± 0.92 | 1.14 ± 1.17 | 1.33 ± 0.99 | 1.53 ± 1.1  |
|                                                     | Single cis-eQTL regions (n=232)              | 0.48±1.71   | 0.81±1.91   | 1.76±2.28   | 2.69±3.3    | 1.7±1.58    | 2.02±2.02   |
|                                                     | Random regions (n=500)                       | 1 ± 1.47    | 1 ± 1.39    | 1 ± 1.03    | 1 ± 1.39    | 1 ± 0.87    | 1 ± 1.11    |
| <b>Anova P values</b>                               |                                              | 0.00013     | 0.1         | 4.95E-11    | 7.17E-31    | 1.75E-13    | 3.84E-20    |
| <b>Post-hoc Tukey P values</b>                      | Cis-eqtl clusters vs CTL                     | 0.91        | 0.82        | 0.037       | <e-5        | 0.98        | 0.069       |
|                                                     | Cis-eqtl clusters vs single cis-eQTL regions | 0.96        | 0.96        | 0.99        | 0.1         | 0.083       | 0.97        |
|                                                     | Cis-eqtl clusters vs random                  | 0.32        | 0.99        | 0.011       | <e-5        | 0.46        | 1.00E-05    |
|                                                     | Control and single cis-eQTL regions          | 0.22        | 0.91        | <e-5        | <e-5        | 0.0034      | 0.0024      |
|                                                     | CTL vs random                                | 0.22        | 0.11        | 0.96        | 0.86        | 0.0034      | 6.00E-05    |
|                                                     | Random vs single cis-eQTL regions            | 7.00E-05    | 0.37        | <e-5        | <e-5        | <e-5        | <e-5        |
