# Supplementary material for: Genome-Wide Detection of Gene Coexpression Domains Showing Linkage to Regions Enriched with Polymorphic Retrotransposons in Recombinant Inbred Mouse Strains
Source: PubMed Central journal article supplement (PMC3618347; doi:10.1534/g3.113.005546), 2013-04-01
Supplement: supp_g3.113.005546_TableS5.pdf [file supp_g3.113.005546_TableS5.pdf]

**Table S5 Normalized abundance of polymorphic and fixed TEs in several sizes of genomic regions around “500 kB” clusters.** Normalized abundance of TEs was calculated by dividing the abundance of each element with that found in random regions. Test regions corresponded to those containing cis-eQTLs (either clustered or single) or control clusters, each region being augmented by flanking regions of either 250, 500, 1000 kb.

|                                                                |                                              | Polymorphic |             |             |             | Total       |             |
|----------------------------------------------------------------|----------------------------------------------|-------------|-------------|-------------|-------------|-------------|-------------|
|                                                                |                                              | full LINES  | LINE frag.  | LTR-TEs     | SINEs       | LTR-TEs     | SINEs       |
| <b>Size of flanking regions</b>                                | 250 kb                                       |             |             |             |             |             |             |
| <b>Mean numbers of elements /MB (fold diff vs random mean)</b> | Cis-eqtl clusters (n=53)                     | 0.66 ± 1.33 | 0.96 ± 1.59 | 2.24 ± 1.73 | 4.00 ± 2.84 | 1.57 ± 1.99 | 2.85 ± 2.8  |
|                                                                | CTL clusters (n=59)                          | 0.89 ± 1.71 | 0.72 ± 0.9  | 1.08 ± 1.1  | 1.29 ± 1.48 | 1.36 ± 1.17 | 1.91 ± 1.43 |
|                                                                | Single cis-eQTL regions (n=232)              | 0.69±1.26   | 0.97±1.19   | 1.69±1.29   | 1.76±1.6    | 1.43±1.14   | 1.64±1.6    |
|                                                                | Random regions (n=500)                       | 1 ± 1.9     | 1 ± 1.56    | 1 ± 1.28    | 1 ± 1.6     | 1 ± 1.19    | 1 ± 1.33    |
| <b>Anova P values</b>                                          |                                              | 0.099       | 0.56        | 8.05E-16    | 3.05E-32    | 9.33E-06    | 1.16E-18    |
| <b>Post-hoc Tukey P values</b>                                 | Cis-eqtl clusters vs CTL                     | 0.88        | 0.8         | 2.00E-05    | <e-5        | 0.81        | 0.0078      |
|                                                                | Cis-eqtl clusters vs single cis-eQTL regions | 0.99        | 1           | 0.028       | <e-5        | 0.88        | <e-5        |
|                                                                | Cis-eqtl clusters vs random                  | 0.5         | 0.99        | <e-5        | <e-5        | 0.008       | <e-5        |
|                                                                | Control and single cis-eQTL regions          | 0.84        | 0.63        | 0.0071      | 0.22        | 0.98        | 0.62        |
|                                                                | CTL vs random                                | 0.96        | 0.48        | 0.97        | 0.59        | 0.14        | 0.00012     |
|                                                                | Random vs single cis-eQTL regions            | 0.09        | 0.99        | <e-5        | <e-5        | 8.00E-05    | <e-5        |

|                                                                |                                              | Polymorphic |             |             |             | Total       |             |
|----------------------------------------------------------------|----------------------------------------------|-------------|-------------|-------------|-------------|-------------|-------------|
|                                                                |                                              | full LINES  | LINE frag.  | LTR-TEs     | SINEs       | LTR-TEs     | SINEs       |
| <b>Size of flanking regions</b>                                | 500 kb                                       |             |             |             |             |             |             |
| <b>Mean numbers of elements /MB (fold diff vs random mean)</b> | Cis-eqtl clusters (n=53)                     | 0.69 ± 1.38 | 1.08 ± 1.73 | 1.80 ± 1.32 | 3.41 ± 2.19 | 1.36 ± 1.16 | 2.39 ± 1.77 |
|                                                                | CTL clusters (n=59)                          | 1.10 ± 1.9  | 0.88 ± 1.05 | 1.08 ± 1.07 | 1.14 ± 1.16 | 1.32 ± 1.1  | 1.60 ± 1.28 |
|                                                                | Single cis-eQTL regions (n=232)              | 0.8±1.2     | 1±1.11      | 1.56±1.1    | 1.58±1.25   | 1.36±1.06   | 1.49±1.41   |
|                                                                | Random regions (n=500)                       | 1 ± 1.67    | 1 ± 1.49    | 1 ± 1.15    | 1 ± 1.54    | 1 ± 1.03    | 1 ± 1.22    |
| <b>Anova P values</b>                                          |                                              | 0.19        | 0.8         | 2.65E-11    | 5.09E-27    | 3.93E-05    | 2.80E-14    |
| <b>Post-hoc Tukey P values</b>                                 | Cis-eqtl clusters vs CTL                     | 0.49        | 0.86        | 0.0046      | <e-5        | 0.99        | 0.0092      |
|                                                                | Cis-eqtl clusters vs single cis-eQTL regions | 0.96        | 0.97        | 0.51        | <e-5        | 0.99        | 5.00E-05    |
|                                                                | Cis-eqtl clusters vs random                  | 0.50        | 0.97        | 1.00E-05    | <e-5        | 0.088       | <e-5        |
|                                                                | Control and single cis-eQTL regions          | 0.52        | 0.93        | 0.019       | 0.17        | 0.99        | 0.93        |
|                                                                | CTL vs random                                | 0.96        | 0.91        | 0.96        | 0.9         | 0.117       | 0.0054      |
|                                                                | Random vs single cis-eQTL regions            | 0.35        | 0.99        | <e-5        | 1.00E-05    | 9.00E-05    | 2.00E-05    |

|                                                                |                                              | Polymorphic |             |             |             | Total       |             |
|----------------------------------------------------------------|----------------------------------------------|-------------|-------------|-------------|-------------|-------------|-------------|
|                                                                |                                              | full LINES  | LINE frag.  | LTR-TEs     | SINEs       | LTR-TEs     | SINEs       |
| <b>Size of flanking regions</b>                                | 1 MB                                         |             |             |             |             |             |             |
| <b>Mean numbers of elements /MB (fold diff vs random mean)</b> | Cis-eqtl clusters (n=53)                     | 0.76 ± 1.21 | 1.06 ± 1.34 | 1.58 ± 1.04 | 2.93 ± 1.87 | 1.18 ± 0.86 | 2.02 ± 1.45 |
|                                                                | CTL clusters (n=59)                          | 1.01 ± 1.43 | 0.94 ± 1.08 | 1.03 ± 0.91 | 1.06 ± 1.02 | 1.16 ± 0.85 | 1.31 ± 0.95 |
|                                                                | Single cis-eQTL regions (n=232)              |             |             |             |             |             |             |
|                                                                | Random regions (n=500)                       | 1 ± 1.4     | 1 ± 1.36    | 1 ± 0.99    | 1 ± 1.35    | 1 ± 0.84    | 1 ± 1.07    |
| <b>Anova P values</b>                                          |                                              | 1.97E-05    | 0.42        | 8.00E-10    | 3.84E-26    | 3.43E-13    | 4.94E-19    |
| <b>Post-hoc Tukey P values</b>                                 | Cis-eqtl clusters vs CTL                     | 0.78        | 0.97        | 0.16        | 1.00E-05    | 0.9         | 0.04        |
|                                                                | Cis-eqtl clusters vs single cis-eQTL regions | 0.47        | 0.7         | 0.9         | 0.75        | 0.012       | 0.99        |
|                                                                | Cis-eqtl clusters vs random                  | 0.65        | 0.99        | 0.022       | <e-5        | 0.65        | <e-5        |
|                                                                | Control and single cis-eQTL regions          | 0.034       | 0.9         | 0.004       | 0           | 0.0047      | 0.0036      |
|                                                                | CTL vs random                                | 0.99        | 0.99        | 0.99        | 0.99        | 0.72        | 0.39        |
|                                                                | Random vs single cis-eQTL regions            | 1.00E-05    | 0.39        | <e-5        | <e-5        | <e-5        | <e-5        |
