# Supplementary material for: Genome-Wide Detection of Gene Coexpression Domains Showing Linkage to Regions Enriched with Polymorphic Retrotransposons in Recombinant Inbred Mouse Strains
Source: PubMed Central journal article supplement (PMC3618347; doi:10.1534/g3.113.005546), 2013-04-01
Supplement: supp_g3.113.005546_TableS6.pdf [file supp_g3.113.005546_TableS6.pdf]

**Table S6 Most significantly enriched binding sites in polymorphic SINEs**

| Motif Name (family)              | CHIP-Seq cell line | Consensus            | P-value   | % of Target Sequences with Motif | % of Background Sequences with Motif |
|----------------------------------|--------------------|----------------------|-----------|----------------------------------|--------------------------------------|
| <b>CTCF /BORIS (Zinc finger)</b> | K562               | CNNBRGCGCCCCCTGSTGGC | 1e-1283   | 63.96%                           | 3.33%                                |
| ZNF143 (Zinc finger)             | CUTT1              | ATTTCCAGVAKSCY       | 1e-1273   | 73.63%                           | 5.91%                                |
| c-Myc                            | mES                | VVCCACGTGG           | 1e-1213   | 75.98%                           | 7.34%                                |
| n-Myc (Helix-Loop-Helix)         | mES                | VRCCACGTGG           | 1e-1116   | 76.39%                           | 8.77%                                |
| Max (Helix-Loop-Helix)           | K562               | RCCACGTGGYYN         | 1e-1094   | 77.54%                           | 9.57%                                |
| RUNX (Runt)                      | HPC7               | SAAACCACAG           | 1e-1000   | 76.44%                           | 10.61%                               |
| Gfi1b (Zinc finger)              | HPC7               | MAACTACTGC           | 1e-996    | 72.28%                           | 8.82%                                |
| RUNX2 (Runt)                     | PCa                | NWAACCACADNN         | 1e-906    | 76.44%                           | 12.37%                               |
| RUNX1 (Runt)                     | Jurkat             | AAACCACARM           | 1e-820    | 76.70%                           | 14.39%                               |
| Cdx2 (Homeobox)                  | mES                | GYMATAAAAH           | 1e-623    | 63.70%                           | 11.95%                               |
| Olig2 (Helix-Loop-Helix))        | Neuron             | RCCATMTGTT           | 1e-613    | 79.10%                           | 22.14%                               |
| HNF4a (Nuclear Receptors)        | HpeG2              | CARRGKBAAAAGTYCA     | 1e-359    | 33.54%                           | 4.58%                                |
| GATA3 (Zinc finger)              | iTreg              | AGATSTNDNDSAGATAASN  | 1e-322    | 23.19%                           | 1.97%                                |
| Erra ( NR)                       | HepG2              | CAAAGGTCAG           | 1.00E-304 | 62.35%                           | 22.53%                               |
| FOXA1 (Forkhead)                 | MCF7               | WAAGTAAACA           | 1.00E-304 | 53.46%                           | 16.26%                               |
| Smad3 (MAD)                      | NPC                | TWGTCTGV             | 1.00E-265 | 68.28%                           | 29.69%                               |
| FOXA1 (Forkhead)                 | LNCaP              | WAAGTAAACA           | 1.00E-265 | 54.08%                           | 18.54%                               |
| AR-halbsite (Nuclear Receptors)  | LNCaP              | CCAGGAACAG           | 1.00E-232 | 78.00%                           | 41.54%                               |
| Nkx2.5 (Homeobox)                | HL1                | RRSCACTYAA           | 1.00E-182 | 56.89%                           | 25.78%                               |
| Nanog (Homeobox)                 | mES                | RGCCATTAAC           | 1.00E-106 | 69.53%                           | 44.63%                               |
| NeuroD1 (Helix-Loop-Helix)       | Islet              | GCCATCTGTT           | 1.00E-102 | 25.07%                           | 8.50%                                |
| <b>CTCF (Zinc finger)</b>        | CD4+               | AYAGTGCCMYCTRGTGGCCA | 1.00E-67  | 9.26%                            | 1.82%                                |
