# Supplementary material for: Genome-Wide Detection of Gene Coexpression Domains Showing Linkage to Regions Enriched with Polymorphic Retrotransposons in Recombinant Inbred Mouse Strains
Source: PubMed Central journal article supplement (PMC3618347; doi:10.1534/g3.113.005546), 2013-04-01
Supplement: supp_g3.113.005546_TableS7.pdf [file supp_g3.113.005546_TableS7.pdf]

**Table S7 Comparisons for respective normalized abundance of binding sites for regulatory factors in several sizes of genomic regions around “250 kb” clusters.** Normalized abundances of binding sites for regulatory factors was calculated in regions containing cis-eQTL cluster, control cluster, single cis-eQTL region or random regions, and augmented by flanking region of either 250, 500, 1000 kb.

|                                                     |                                              | CTSF        | h3ac        | gata4       | MEF2A       | NKX2_5      | SRF         | TBX5        | P300        |
|-----------------------------------------------------|----------------------------------------------|-------------|-------------|-------------|-------------|-------------|-------------|-------------|-------------|
| <b>Size of flanking regions</b>                     | 250 kb                                       |             |             |             |             |             |             |             |             |
| <b>Normalized abundance of TFs / MB (mean ± SD)</b> | Cis-eqtl clusters (n=42)                     | 2.81 ± 0.94 | 4.20 ± 2.89 | 2.10 ± 1.65 | 2.67 ± 4.8  | 2.11 ± 1.65 | 4.02 ± 2.92 | 3.65 ± 2.52 | 2.43 ± 2.22 |
|                                                     | CTL clusters (n=188)                         | 1.76 ± 0.69 | 1.85 ± 1.19 | 1.72 ± 1.29 | 1.47 ± 3.27 | 1.86 ± 1.62 | 1.87 ± 1.51 | 1.91 ± 1.67 | 1.64 ± 1.8  |
|                                                     | Single cis-eQTL regions (n=232)              | 1.63 ± 0.73 | 1.81 ± 1.6  | 1.68 ± 1.4  | 1.34 ± 2.53 | 1.64 ± 1.41 | 1.9 ± 1.85  | 1.85 ± 1.73 | 1.7 ± 1.89  |
|                                                     | Random regions (n=500)                       | 1 ± 0.89    | 1 ± 1.57    | 1 ± 1.46    | 1 ± 4.16    | 1 ± 1.63    | 1 ± 1.58    | 1 ± 1.57    | 1 ± 1.61    |
| <b>Anova P values</b>                               |                                              | 4.4E-56     | 7.65E-37    | 6.20E-14    | 0.026       | 8.29E-13    | 5.89E-31    | 3.68E-27    | 1.48E-10    |
| <b>Post-hoc Tukey P values</b>                      | Cis-eqtl clusters vs CTL                     | <e-5        | <e-5        | 0.40684     | 0.22        | 0.77        | <e-5        | <e-5        | 0.039       |
|                                                     | Cis-eqtl clusters vs single cis-eQTL regions | <e-5        | <e-5        | 0.29376     | 0.140       | 0.27        | <e-5        | <e-5        | 0.059       |
|                                                     | Cis-eqtl clusters vs random                  | <e-5        | <e-5        | 1.00E-05    | 0.025       | 7.00E-05    | <e-5        | <e-5        | <e-5        |
|                                                     | Control and single cis-eQTL regions          | 0.41        | 0.99        | 0.98        | 0.98        | 0.49        | 0.99        | 0.97        | 0.98        |
|                                                     | CTL vs random                                | <e-5        | <e-5        | <e-5        | 0.44        | <e-5        | <e-5        | <e-5        | 0.00014     |
|                                                     | Random vs single cis-eQTL regions            | <e-5        | <e-5        | <e-5        | 0.65        | <e-5        | <e-5        | <e-5        | <e-5        |
|                                                     | Cis-eqtl clusters vs CTL                     | <e-5        | <e-5        | 0.4         | 0.22        | 0.77        | <e-5        | <e-5        | 0.039       |

|                                                     |                                              | CTSF        | h3ac        | gata4       | MEF2A       | NKX2_5      | SRF         | TBX5        | P300        |
|-----------------------------------------------------|----------------------------------------------|-------------|-------------|-------------|-------------|-------------|-------------|-------------|-------------|
| <b>Size of flanking regions</b>                     | 500 kb                                       |             |             |             |             |             |             |             |             |
| <b>Normalized abundance of TFs / MB (mean ± SD)</b> | Cis-eqtl clusters (n=42)                     | 2.43 ± 0.78 | 3.60 ± 2.36 | 2.06 ± 1.5  | 2.67 ± 4.69 | 2.06 ± 1.69 | 3.47 ± 2.58 | 3.24 ± 2.17 | 2.03 ± 1.64 |
|                                                     | CTL clusters (n=188)                         | 1.57 ± 0.59 | 1.63 ± 1.14 | 1.60 ± 1.07 | 1.42 ± 3.16 | 1.79 ± 1.56 | 1.69 ± 1.33 | 1.72 ± 1.54 | 1.33 ± 1.27 |
|                                                     | Single cis-eQTL regions (n=232)              | 1.5 ± 0.67  | 1.61 ± 1.33 | 1.59 ± 1.18 | 1.26 ± 2.11 | 1.58 ± 1.32 | 1.7 ± 1.65  | 1.66 ± 1.56 | 1.4 ± 1.3   |
|                                                     | Random regions (n=500)                       | 1 ± 0.84    | 1 ± 1.42    | 1 ± 1.26    | 1 ± 3.44    | 1 ± 1.44    | 1 ± 1.47    | 1 ± 1.48    | 1 ± 1.31    |
| <b>Anova P values</b>                               |                                              | 1.88E-41    | 1.06E-30    | 9.36E-15    | 0.0081      | 5.40E-13    | 6.99E-25    | 6.61E-22    | 1.34E-07    |
| <b>Post-hoc Tukey P values</b>                      | Cis-eqtl clusters vs CTL                     | <e-5        | <e-5        | 0.12        | 0.099       | 0.69        | <e-5        | <e-5        | 0.0094      |
|                                                     | Cis-eqtl clusters vs single cis-eQTL regions | <e-5        | <e-5        | 0.1         | 0.04        | 0.195       | <e-5        | <e-5        | 0.02        |
|                                                     | Cis-eqtl clusters vs random                  | <e-5        | <e-5        | <e-5        | 0.0063      | 4.00E-05    | <e-5        | <e-5        | 1.00E-05    |
|                                                     | Control and single cis-eQTL regions          | 0.76        | 0.99        | 0.99        | 0.95        | 0.45        | 0.99        | 0.979       | 0.94        |
|                                                     | CTL vs random                                | <e-5        | <e-5        | <e-5        | 0.41        | 0 <e-5      | <e-5        | <e-5        | 0.019       |
|                                                     | Random vs single cis-eQTL regions            | <e-5        | <e-5        | <e-5        | 0.73        | <e-5        | <e-5        | <e-5        | 8.00E-04    |
|                                                     | Cis-eqtl clusters vs CTL                     | <e-5        | <e-5        | 0.12        | 0.099       | 0.690       | <e-5        | <e-5        | 0.009       |

|                                                     |                                              | CTSF        | h3ac        | <i>gata4</i> | MEF2A      | NKX2_5      | SRF         | TBX5        | P300        |
|-----------------------------------------------------|----------------------------------------------|-------------|-------------|--------------|------------|-------------|-------------|-------------|-------------|
| <b>Size of flanking regions</b>                     | 1 MB                                         |             |             |              |            |             |             |             |             |
| <b>Normalized abundance of TFs / MB (mean ± SD)</b> | Cis-eqtl clusters (n=42)                     | 2.15 ± 0.7  | 3.16 ± 1.98 | 1.87 ± 1.18  | 2.63 ± 5.5 | 1.82 ± 1.43 | 2.99 ± 2.2  | 2.90 ± 1.94 | 1.69 ± 1.11 |
|                                                     | CTL clusters (n=188)                         | 1.45 ± 0.56 | 1.48 ± 0.97 | 1.45 ± 0.87  | 1.38 ± 3.2 | 1.59 ± 1.33 | 1.51 ± 1.19 | 1.53 ± 1.35 | 1.23 ± 0.96 |
|                                                     | Single cis-eQTL regions (n=232)              | 1.4±0.6     | 1.44±1.12   | 1.44±0.96    | 1.16±1.71  | 1.45±1.13   | 1.49±1.35   | 1.47±1.34   | 1.29±0.95   |
|                                                     | Random regions (n=500)                       | 1 ± 0.76    | 1 ± 1.27    | 1 ± 1.01     | 1 ± 2.92   | 1 ± 1.17    | 1 ± 1.32    | 1 ± 1.34    | 1 ± 1.08    |
| <b>Anova P values</b>                               |                                              | 4.82E-33    | 4.59E-27    | 7.69E-14     | 0.004      | 6.77E-11    | 1.98E-20    | 2.12E-18    | 5.31E-06    |
| <b>Post-hoc Tukey P values</b>                      | Cis-eqtl clusters vs CTL                     | <e-5        | <e-5        | 0.05         | 0.05       | 0.65        | <e-5        | <e-5        | 0.038       |
|                                                     | Cis-eqtl clusters vs single cis-eQTL regions | <e-5        | <e-5        | 0.04         | 0.013      | 0.25        | <e-5        | <e-5        | 0.087       |
|                                                     | Cis-eqtl clusters vs random                  | <e-5        | <e-5        | <e-5         | 0.0028     | 0.00014     | <e-5        | <e-5        | 0.00017     |
|                                                     | Control and single cis-eQTL regions          | 0.82        | 0.97        | 0.99         | 0.86       | 0.65        | 0.99        | 0.97        | 0.92        |
|                                                     | CTL vs random                                | <e-5        | 3.00E-05    | <e-5         | 0.42       | <e-5        | 6.00E-05    | 4.00E-05    | 0.05        |
|                                                     | Random vs single cis-eQTL regions            | <e-5        | 5.00E-05    | <e-5         | 0.9        | 2.00E-05    | 4.00E-05    | 9.00E-05    | 0.002       |
|                                                     | Cis-eqtl clusters vs CTL                     | <e-5        | <e-5        | 0.059        | 0.056      | 0.65        | <e-5        | <e-5        | 0.038       |
