# Supplementary material for: Genome-Wide Detection of Gene Coexpression Domains Showing Linkage to Regions Enriched with Polymorphic Retrotransposons in Recombinant Inbred Mouse Strains
Source: PubMed Central journal article supplement (PMC3618347; doi:10.1534/g3.113.005546), 2013-04-01
Supplement: supp_g3.113.005546_TableS8.pdf [file supp_g3.113.005546_TableS8.pdf]

**Table S8 Comparisons for respective normalized abundance of binding sites for regulatory factors in several sizes of genomic regions around “500 kb” clusters.** Normalized abundances of binding sites for regulatory factors was calculated in regions containing cis-eQTL cluster, control cluster, single cis-eQTL region or random regions, and augmented by flanking region of either 250, 500, 1000 kb.

|                                                     |                                              | CTSF        | h3ac        | gata4       | MEF2A       | NKX2_5      | SRF         | TBX5        | P300        |
|-----------------------------------------------------|----------------------------------------------|-------------|-------------|-------------|-------------|-------------|-------------|-------------|-------------|
| <b>Size of flanking regions</b>                     | 250 kb                                       |             |             |             |             |             |             |             |             |
| <b>Normalized abundance of TFs / MB (mean ± SD)</b> | Cis-eqtl clusters (n=53)                     | 2.50 ± 1.01 | 3.60 ± 2.53 | 1.96 ± 1.44 | 2.15 ± 4.14 | 1.91 ± 1.5  | 3.30 ± 2.59 | 3.18 ± 2.31 | 2.22 ± 1.81 |
|                                                     | CTL clusters (n=59)                          | 1.49 ± 0.56 | 1.53 ± 1.06 | 1.47 ± 1.37 | 1.30 ± 2.43 | 1.45 ± 1.27 | 1.37 ± 1.23 | 1.20 ± 0.94 | 1.31 ± 1.42 |
|                                                     | Single cis-eQTL regions (n=232)              | 1.58±0.71   | 1.7±1.45    | 1.63±1.29   | 1.27±2.21   | 1.62±1.39   | 1.81±1.75   | 1.75±1.63   | 1.53±1.52   |
|                                                     | Random regions (n=500)                       | 1 ± 0.86    | 1 ± 1.47    | 1 ± 1.34    | 1 ± 3.71    | 1 ± 1.55    | 1 ± 1.51    | 1 ± 1.52    | 1 ± 1.41    |
| <b>Anova P values</b>                               |                                              | 6.89E-41    | 2.25E-30    | 3.74E-11    | 0.1         | 1.80E-08    | 3.74E-23    | 2.03E-22    | 1.15E-09    |
| <b>Post-hoc Tukey P values</b>                      | Cis-eqtl clusters vs CTL                     | <e-5        | <e-5        | 0.21        | 0.53        | 0.35        | <e-5        | <e-5        | 0.0062      |
|                                                     | Cis-eqtl clusters vs single cis-eQTL regions | <e-5        | <e-5        | 0.37        | 0.30        | 0.56        | <e-5        | <e-5        | 0.011       |
|                                                     | Cis-eqtl clusters vs random                  | <e-5        | <e-5        | <e-5        | 0.079       | 0.00014     | <e-5        | <e-5        | <e-5        |
|                                                     | Control and single cis-eQTL regions          | 0.86        | 0.86        | 0.83        | 0.99        | 0.86        | 0.25        | 0.08        | 0.73        |
|                                                     | CTL vs random                                | 1.00E-04    | 0.058       | 0.053       | 0.91        | 0.12        | 0.35        | 0.79        | 0.42        |
|                                                     | Random vs single cis-eQTL regions            | <e-5        | <e-5        | <e-5        | 0.74        | <e-5        | <e-5        | <e-5        | 4.00E-05    |
|                                                     | Cis-eqtl clusters vs CTL                     | <e-5        | <e-5        | 0.21        | 0.53        | 0.35        | <e-5        | <e-5        | 0.0062      |

|                                                     |                                              | CTSF        | h3ac        | gata4       | MEF2A       | NKX2_5      | SRF         | TBX5        | P300        |
|-----------------------------------------------------|----------------------------------------------|-------------|-------------|-------------|-------------|-------------|-------------|-------------|-------------|
| <b>Size of flanking regions</b>                     | 500 kb                                       |             |             |             |             |             |             |             |             |
| <b>Normalized abundance of TFs / MB (mean ± SD)</b> | Cis-eqtl clusters (n=53)                     | 2.21 ± 0.78 | 3.08 ± 2.2  | 1.79 ± 1.34 | 2.19 ± 4.77 | 1.72 ± 1.35 | 2.82 ± 2.36 | 2.81 ± 2.03 | 1.87 ± 1.38 |
|                                                     | CTL clusters (n=59)                          | 1.26 ± 0.45 | 1.15 ± 0.75 | 1.30 ± 1.1  | 1.23 ± 2.17 | 1.30 ± 1.26 | 1.11 ± 0.95 | 0.99 ± 0.79 | 1.07 ± 1.05 |
|                                                     | Single cis-eQTL regions (n=232)              | 1.46 ± 0.66 | 1.56 ± 1.26 | 1.54 ± 1.1  | 1.25 ± 1.99 | 1.52 ± 1.24 | 1.62 ± 1.54 | 1.59 ± 1.49 | 1.33 ± 1.12 |
|                                                     | Random regions (n=500)                       | 1 ± 0.81    | 1 ± 1.36    | 1 ± 1.16    | 1 ± 3.21    | 1 ± 1.33    | 1 ± 1.42    | 1 ± 1.44    | 1 ± 1.2     |
| <b>Anova P values</b>                               |                                              | 2.53E-31    | 1.46E-24    | 2.40E-10    | 0.0467      | 1.93E-07    | 1.39E-17    | 2.76E-18    | 4.06E-07    |
| <b>Post-hoc Tukey P values</b>                      | Cis-eqtl clusters vs CTL                     | <e-5        | <e-5        | 0.10        | 0.32        | 0.33        | <e-5        | <e-5        | 0.0022      |
|                                                     | Cis-eqtl clusters vs single cis-eQTL regions | <e-5        | <e-5        | 0.45        | 0.165       | 0.76        | <e-5        | <e-5        | 0.016       |
|                                                     | Cis-eqtl clusters vs random                  | <e-5        | <e-5        | 1.00E-05    | 0.03        | 0.0008      | <e-5        | <e-5        | <e-5        |
|                                                     | Control and single cis-eQTL regions          | 0.28507     | 0.18261     | 0.51        | 0.99        | 0.65        | 0.094       | 0.025       | 0.43        |
|                                                     | CTL vs random                                | 0.05502     | 0.84625     | 0.22        | 0.94        | 0.32        | 0.94        | 0.99        | 0.97        |
|                                                     | Random vs single cis-eQTL regions            | <e-5        | <e-5        | <e-5        | 0.71        | <e-5        | <e-5        | <e-5        | 0.002       |
|                                                     | Cis-eqtl clusters vs CTL                     | <e-5        | <e-5        | 0.1         | 0.32        | 0.33        | <e-5        | <e-5        | 0.002       |

|                                                     |                                              | CTSF        | h3ac        | gata4       | MEF2A       | NKX2_5      | SRF         | TBX5        | P300        |
|-----------------------------------------------------|----------------------------------------------|-------------|-------------|-------------|-------------|-------------|-------------|-------------|-------------|
| <b>Size of flanking regions</b>                     | 1 MB                                         |             |             |             |             |             |             |             |             |
| <b>Normalized abundance of TFs / MB (mean ± SD)</b> | Cis-eqtl clusters (n=53)                     | 1.97 ± 0.65 | 2.61 ± 1.79 | 1.64 ± 1.03 | 1.97 ± 4.7  | 1.53 ± 1.15 | 2.43 ± 1.9  | 2.48 ± 1.79 | 1.69 ± 1.06 |
|                                                     | CTL clusters (n=59)                          | 1.14 ± 0.47 | 1.02 ± 0.66 | 1.16 ± 0.81 | 0.96 ± 1.59 | 1.16 ± 0.97 | 0.96 ± 0.77 | 0.88 ± 0.67 | 1.02 ± 0.2  |
|                                                     | Single cis-eQTL regions (n=232)              | 1.38±0.6    | 1.42±1.1    | 1.42±0.91   | 1.1±1.58    | 1.42±1.07   | 1.46±1.32   | 1.45±1.32   | 1.3±0.95    |
|                                                     | Random regions (n=500)                       | 1 ± 0.74    | 1 ± 1.27    | 1 ± 0.97    | 1 ± 3.22    | 1 ± 1.15    | 1 ± 1.3     | 1 ± 1.32    | 1 ± 1.06    |
| <b>Anova P values</b>                               |                                              | 2.61E-25    | 1.28E-18    | 1.80E-09    | 0.13        | 3.93E-06    | 4.28E-14    | 3.91E-15    | 6.14E-07    |
| <b>Post-hoc Tukey P values</b>                      | Cis-eqtl clusters vs CTL                     | <e-5        | <e-5        | 0.042       | 0.25        | 0.28        | <e-5        | <e-5        | 0.0025      |
|                                                     | Cis-eqtl clusters vs single cis-eQTL regions | <e-5        | <e-5        | 0.43        | 0.19        | 0.9         | 1.00E-05    | <e-5        | 0.055       |
|                                                     | Cis-eqtl clusters vs random                  | <e-5        | <e-5        | 2.00E-05    | 0.092       | 0.0056      | <e-5        | <e-5        | 1.00E-05    |
|                                                     | Control and single cis-eQTL regions          | 0.087       | 0.12        | 0.25        | 0.98        | 0.38        | 0.04        | 0.016       | 0.21        |
|                                                     | CTL vs random                                | 0.41        | 0.99        | 0.59        | 0.99        | 0.73        | 0.99        | 0.91        | 0.99        |
|                                                     | Random vs single cis-eQTL regions            | <e-5        | 0.00014     | <e-5        | 0.97        | 2.00E-05    | 9.00E-05    | 1.00E-04    | 0.0009      |
|                                                     | Cis-eqtl clusters vs CTL                     | <e-5        | <e-5        | 0.04        | 0.25        | 0.28        | <e-5        | <e-5        | 0.0025      |
