# Supplementary material for: Genome-Wide Detection of Gene Coexpression Domains Showing Linkage to Regions Enriched with Polymorphic Retrotransposons in Recombinant Inbred Mouse Strains
Source: PubMed Central journal article supplement (PMC3618347; doi:10.1534/g3.113.005546), 2013-04-01
Supplement: supp_g3.113.005546_TableS9.pdf [file supp_g3.113.005546_TableS9.pdf]

**Table S9 Descriptive information concerning the 42 “250 kB” cis-eQTL clusters**

| Chr | Start     | end       | Length | Number of cis-eQTLs | Symbols of cis-eQTL genes                                                 |
|-----|-----------|-----------|--------|---------------------|---------------------------------------------------------------------------|
| 1   | 172981698 | 173434853 | 453155 | 11                  | FCGR3,1700009P17RIK,SDHCAPOA2,FCER1G,B4GALT3,PPOX,UFC1,KLHDC9,F11R,REFBP2 |
| 1   | 173934520 | 174206100 | 271580 | 5                   | VANGL2,NCSTN,COPA,PEX19,ATP1A2                                            |
| 1   | 182837968 | 183096385 | 258417 | 4                   | PYCR2,LEFTY1,TMEM63A,CNIH4                                                |
| 2   | 25207840  | 25354300  | 146460 | 4                   | DPP7,UAP1L1,ENTPD2,C8G                                                    |
| 2   | 103921214 | 103964818 | 43604  | 3                   | CD59B,CD59A,A930018P22RIK                                                 |
| 2   | 152590596 | 153048274 | 457678 | 6                   | COX4I2,FKHL18,PDRG1,BC020535,TM9SF4,TSPYL3                                |
| 3   | 35794225  | 35988326  | 194101 | 3                   | LOC100046841,MCCC1,ACAD9                                                  |
| 3   | 87719934  | 87861011  | 141077 | 3                   | HDGF,NES,APOA1BP,                                                         |
| 4   | 41585069  | 41791875  | 206806 | 3                   | DNAIC1,CCL27,CCL19,                                                       |
| 4   | 62160379  | 62363247  | 202868 | 3                   | HDHD3,ALAD,RGS3,                                                          |
| 4   | 129193683 | 129525601 | 331918 | 4                   | LOC100046039,X2510006D16RIK,CCDC28B,PTP4A2                                |
| 4   | 132086525 | 132456695 | 370170 | 4                   | ATPIF1,EYA3,XKR8,BC008163                                                 |
| 4   | 132754041 | 133147532 | 393491 | 7                   | WASF2,MAP3K6SLC9A1,4732473B16RIK,2300002D11RIK,NUDCGPN2,                  |
| 4   | 133912418 | 134093953 | 181535 | 4                   | EXTL1,STMN1,2410166I05RIK,SEPN1                                           |
| 4   | 155207073 | 155364772 | 157699 | 6                   | AURKAIP1,DVL1,ACAP3,LOC545056,FAM132A,B3GALT6,                            |
| 5   | 147765528 | 147890516 | 124988 | 3                   | GTF3A,MTIF3,POLR1D                                                        |
| 6   | 126875000 | 127079686 | 204686 | 3                   | RAD51AP1,X963003F20RIK,CCND2                                              |
| 6   | 145123111 | 145168681 | 45570  | 4                   | LRMP,CASC1,LYRM5,KRAS                                                     |
| 7   | 19441998  | 19831693  | 389695 | 4                   | MILL2,IRF2BP1,DMWD,D630048P19RIK                                          |
| 7   | 30975506  | 31426230  | 450724 | 5                   | CAPNS1,TBCB,TYROBP,HSPB6,RBM42                                            |
| 7   | 87461806  | 87505819  | 44013  | 4                   | RCCD1,LOC675567,UNC45A,MAN2A2                                             |
| 8   | 32207411  | 32371718  | 164307 | 3                   | DUSP26,RBM13,FUT10                                                        |
| 8   | 87194527  | 87621384  | 426857 | 11                  | NACC1,TRMT1,NFIX,FARSA,GCDH,PRDX2,HOKK2,ASNA1,DHPS,1500041N16RIK,MAN2B1   |
| 8   | 124990160 | 125154233 | 164073 | 3                   | RNF166,TRAPPC2L,CBFA2T3H                                                  |
| 9   | 34933919  | 35024383  | 90464  | 3                   | DCPS,FOXRED1,SRPR                                                         |
| 9   | 44199978  | 44212071  | 12093  | 3                   | HYOU1,SLC37A4,TRAPPC4                                                     |
| 9   | 44806893  | 44962140  | 155247 | 3                   | CD3E,AMICA1,SCN4B                                                         |
| 9   | 106097518 | 106372827 | 275309 | 7                   | PPM1M,TWF2,DUSP7,RPL29,ACY1,ABHD14A,PARP3                                 |
| 11  | 58804677  | 59235079  | 430402 | 4                   | TRIM11,GJC2,MRPL55,1110031B06RIK                                          |
| 11  | 59589470  | 59689992  | 100522 | 3                   | MPRIIP,COPS3,NT5M                                                         |
| 11  | 82619501  | 82756537  | 137036 | 3                   | RFFL,LOC100044934,UNC45B                                                  |
| 11  | 94830377  | 95136060  | 305683 | 5                   | SGCA,SAMD14,PK2,ITGA3,MYST2                                               |
| 11  | 96799199  | 96910230  | 111031 | 3                   | PNPO,SCRN2,MRPL10                                                         |
| 11  | 114844007 | 115044431 | 200424 | 3                   | 4732429D16RIK,SLC9A3R1,LOC100044159                                       |
| 13  | 64234749  | 64540754  | 306005 | 6                   | ZFP367,HABP4,CDC14B,1110018J18RIK,CTSL,CCRK                               |
| 13  | 113657734 | 114008245 | 350511 | 5                   | PPAP2A,SKIV2L2,GPX8,2310016C16RIK,ESM1                                    |
| 15  | 76545807  | 76682760  | 136953 | 3                   | LRRC24,C030006K11RIK,ZFP251                                               |
| 15  | 85727285  | 85967913  | 240628 | 3                   | TRMU,CELSR1,GRAMD4                                                        |
| 16  | 20651876  | 20742404  | 90528  | 3                   | PSMD2,EIF4G1,CHRD                                                         |
| 17  | 24645834  | 25029013  | 383179 | 5                   | TRAF7,GFER,NDUFB10,FAHD1,SPSB3                                            |
| 17  | 34056177  | 34163052  | 106875 | 3                   | ZBTB22,WDR46,H2.KE6                                                       |
| 18  | 37847239  | 37909257  | 62018  | 3                   | PCDHGA4,PCDHGB2,PCDHGA10                                                  |
